# Supplementary material
Source: PubMed Central journal article supplement (PMC9467573)
Supplement: mmc1.pdf [file mmc1.pdf]

Annex 1 : Wastewater and sludge treatment characteristics for the Seine center and Reims  
WWTPs

| <b>Seine center WWTP characteristics</b> |                                                                                                                                                     |
|------------------------------------------|-----------------------------------------------------------------------------------------------------------------------------------------------------|
| Nominal size                             | 1.000.000 p. equivalent                                                                                                                             |
| Treatment                                | Tools                                                                                                                                               |
| <u><i>pretreatment</i></u>               |                                                                                                                                                     |
| Screening                                | Grids and screens                                                                                                                                   |
| Grit removal                             | Basins                                                                                                                                              |
| Deoiling                                 | Diffusion of air micro-bubbles by aerating pumps                                                                                                    |
| <u><i>Wastewater treatment</i></u>       |                                                                                                                                                     |
| Primary treatments:                      | Decanters                                                                                                                                           |
| physico-chemical                         | Ferric chloride and polymers                                                                                                                        |
| lamellar settling                        | Precipitation of metal salts                                                                                                                        |
| Secondary treatments:                    | Clay bead bed biofilters (aerobic environment)                                                                                                      |
| cultures fixed on biofilters             | Polystyrene bead bed biofilters                                                                                                                     |
|                                          | Clay bead bed biofilters (denitrification with methanol, anoxia)                                                                                    |
| <u><i>Sludge treatment</i></u>           |                                                                                                                                                     |
| Thickening                               | Cylindrical-conical floaters<br>Centrifuges                                                                                                         |
| Incineration                             | Fluidised sand bed kilns                                                                                                                            |
| <b>Reims WWTP characteristics</b>        |                                                                                                                                                     |
| Nominal size                             | 470.000 p. equivalent                                                                                                                               |
| Treatment                                | Tools                                                                                                                                               |
| <u><i>pretreatment</i></u>               |                                                                                                                                                     |
| Screening                                | Collection tarpaulins and grids                                                                                                                     |
| Grit removal                             | Sedimentation                                                                                                                                       |
| Deoiling                                 | Flotation and skimming                                                                                                                              |
| <u><i>Wastewater treatment</i></u>       |                                                                                                                                                     |
| Secondary treatments                     | Activated sludge treatment with anaerobic basins (dephosphatation ) and aeration basins (oxidation)<br>Degassing pits<br>Clarifier (sludge removal) |
| Tertiary treatments                      | Actiflo type (lamellar floc settling to reduce phosphorus)                                                                                          |
| <u><i>Sludge treatment</i></u>           |                                                                                                                                                     |
| Thickening                               | Flocculation by addition of polymer<br>Ferric chloride                                                                                              |
| Dehydration                              | Sludge liming process<br>Filters press                                                                                                              |
